# Supplementary material
Source: PubMed Central journal article supplement (PMC9932942)
Supplement: jamapsychiatry-e225056-s001.pdf [file jamapsychiatry-e225056-s001.pdf]

## Supplemental Online Content

van Sloten TT, Valentin E, Climie RE, et al. Association of cardiovascular health with risk of clinically relevant depressive symptoms. *JAMA Psychiatry*. Published online February 15, 2023. doi:10.1001/jamapsychiatry.2022.5056

**eMethods.** Calculation of Trajectories of Depressive Symptoms

**eTable 1.** Definition of Cardiovascular Health Metrics

**eTable 2.** Characteristics Measured in 1997 of Included and Excluded Individuals

**eTable 3.** Characteristics of the Total Study Population in 1997 According to the Trajectories of Depressive Symptoms

**eTable 4.** Associations of Cardiovascular Health (in 1997) and 7-Year Change in Cardiovascular Health (Between 1990 and 1997) With Incident Depressive Symptoms—Results of Additional Analysis

**eTable 5.** Associations of Individual Cardiovascular Health Metrics (Measured in 1997) With Incident Clinically Relevant Depressive Symptoms

**eTable 6.** Associations of 7-Year Change in Each Cardiovascular Health Metric (Between 1990 and 1997) With Incident Clinically Relevant Depressive Symptoms

**eReferences.**

This supplementary material has been provided by the authors to give readers additional information about their work.

## eMethods. Calculation of Trajectories of Depressive Symptoms

To calculate trajectories of depressive symptoms, we used a group-based trajectory modeling approach, which is based on a non-parametric mixed model.<sup>1</sup> We estimated the best-fitting number of trajectories based on a minimum Bayesian Information Criterion while maintaining at least 50 participants in each trajectory. Of the initially 8 trajectories obtained, we grouped them into 5 groups for clinical interpretation. The original 8 trajectories are given in eFigure 1 below. The figure shows trajectories of mean CES-D (Center for Epidemiologic Studies Depression Scale) scores over 19 years from the study population of 6,980 individuals, and with up to 7 measures of depressive symptoms. For clinical interpretation, we grouped together trajectories 1 and 2 which have both a CES-D score <10 at each follow-up examination round (new combined low trajectory in the main analysis). We also grouped together the trajectories 3 and 6 that had a CES-D score between 10 and 17 at each follow-up examination (new combined mild trajectory in the main analysis). Finally, we grouped together the trajectories 5 and 7 because these trajectories had the same pattern of moderately high starting CES-D scores, increasing, then remitting (new remitting trajectory in the main analysis). Trajectory 4 corresponds to the low-increasing trajectory and trajectory 8 to the high-increasing trajectory in the main analysis.

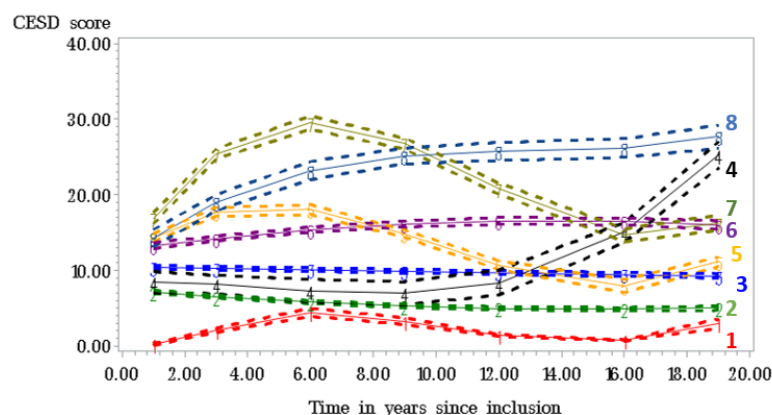

| TRAJECTORY NUMBER | NUMBER OF PARTICIPANTS (%) | NUMBER OF OBSERVATIONS IN EACH TRAJECTORY DURING FU |
|-------------------|----------------------------|-----------------------------------------------------|
| 1                 | 296 (4,2%)                 | 3851                                                |
| 2                 | 2572 (36,9%)               | 21532                                               |
| 3                 | 2687 (38,5%)               | 18072                                               |
| 4                 | 57 (0,8%)                  | 6770                                                |
| 5                 | 424 (6,1%)                 | 1543                                                |
| 6                 | 692 (9,9%)                 | 2343                                                |
| 7                 | 161 (2,3%)                 | 2612                                                |
| 8                 | 91 (1,3%)                  | 985                                                 |

**eFigure 1. The initially obtained eight trajectories of depressive symptoms**

The figure shows trajectories of mean CES-D (Center for Epidemiologic Studies Depression Scale) scores over 19 years from 6,980 individuals, with up to 7 measures of depressive symptoms

**eTable 1.** Definition of Cardiovascular Health Metrics

| <b>Metric</b>            | <b>Intermediate/ideal level</b>                                        | <b>Poor level</b>                                                        |
|--------------------------|------------------------------------------------------------------------|--------------------------------------------------------------------------|
| <b>Smoking</b>           | Never or quit smoking                                                  | Current smokers                                                          |
| <b>Body mass index</b>   | <30 kg/m <sup>2</sup>                                                  | ≥30 kg/m <sup>2</sup>                                                    |
| <b>Physical activity</b> | ≥1h of sports per week                                                 | <1h of sports per week                                                   |
| <b>Healthy diet</b>      | ≥2 portions of fish/week and/or vegetables and fruits everyday         | <2 portions of fish/week and <1 portion of fruits and vegetables per day |
| <b>Blood pressure</b>    | No diagnosis of hypertension and no use of antihypertensive medication | Diagnosis of hypertension or use of antihypertensive medication          |
| <b>Hyperglycemia</b>     | No diagnosis of diabetes and no use of glucose-lowering medication     | Diagnosis of diabetes or use of glucose-lowering medication              |
| <b>Dyslipidemia</b>      | No diagnosis of dyslipidemia and no use of lipid-modifying medication  | Diagnosis of dyslipidemia or use of lipid-modifying medication           |

**eTable 2.** Characteristics Measured in 1997 of Included and Excluded Individuals

|                                   | Included      | Excluded due to prior coronary heart disease or depressive symptoms in 1997 | Excluded due to missing data |
|-----------------------------------|---------------|-----------------------------------------------------------------------------|------------------------------|
|                                   | <b>n=6980</b> | <b>n=3408</b>                                                               | <b>n=10239</b>               |
| Age, mean (standard deviation), y | 53.3 (3.5)    | 53.2 (3.4)                                                                  | 53.1 (3.5)                   |
| Women, %                          | 1671 (23.9)   | 720 (21.1)                                                                  | 3223 (31.5)                  |
| Education level, %                |               | <b>n=3340</b>                                                               | <b>n=9350</b>                |
| High                              | 1968 (28.2)   | 799 (23.9)                                                                  | 1935 (20.7)                  |
| Intermediate                      | 4711 (67.5)   | 2344 (70.2)                                                                 | 6607 (70.7)                  |
| Low                               | 301 (4.3)     | 197 (5.9)                                                                   | 808 (8.6)                    |
| Occupation level, %               |               | <b>n=3340</b>                                                               | <b>n=9350</b>                |
| High                              | 2098 (30.1)   | 754 (22.6)                                                                  | 1769 (18.9)                  |
| Intermediate                      | 4509 (64.6)   | 2291 (68.6)                                                                 | 6773 (72.4)                  |
| Low                               | 373 (5.3)     | 295 (8.8)                                                                   | 808 (8.6)                    |

Values are reported as No. (%) unless otherwise indicated.

**eTable 3.** Characteristics of the Total Study Population in 1997 According to the Trajectories of Depressive Symptoms<sup>a</sup>

|                                                                  | <b>Low trajectory<br/>(n=2868 (41.1%))</b> | <b>Mild trajectory<br/>(n=3379 (48.4%))</b> | <b>Low-increasing<br/>trajectory<br/>(n=57 (0.8%))</b> | <b>Remitting<br/>trajectory<br/>(n=585 (8.4%))</b> | <b>High-increasing<br/>trajectory<br/>(n=91 (1.3%))</b> |
|------------------------------------------------------------------|--------------------------------------------|---------------------------------------------|--------------------------------------------------------|----------------------------------------------------|---------------------------------------------------------|
| <b>Characteristics</b>                                           |                                            |                                             |                                                        |                                                    |                                                         |
| Age, mean (SD), years                                            | 53.5 (10.3)                                | 53.5 (12.9)                                 | 54.4 (12.0)                                            | 51.6 (3.8)                                         | 52.1 (15.9)                                             |
| Women                                                            | 412 (14.4%)                                | 865 (25.6%)                                 | 14 (24.6%)                                             | 324 (55.4%)                                        | 56 (61.5%)                                              |
| Education level                                                  |                                            |                                             |                                                        |                                                    |                                                         |
| High                                                             | 840 (29.3%)                                | 912 (27.0%)                                 | 11 (19.3%)                                             | 180 (30.8%)                                        | 25 (27.5%)                                              |
| Intermediate                                                     | 1920 (67%)                                 | 2315 (68.5%)                                | 41 (71.9%)                                             | 375 (64.1%)                                        | 60 (65.9%)                                              |
| Low                                                              | 108 (3.8%)                                 | 152 (4.5%)                                  | 5 (8.8%)                                               | 30 (5.1%)                                          | 6 (6.6%)                                                |
| Occupation level                                                 |                                            |                                             |                                                        |                                                    |                                                         |
| High                                                             | 975 (34.0%)                                | 976 (28.9%)                                 | 13 (22.87%)                                            | 116 (19.8%)                                        | 18 (19.8%)                                              |
| Intermediate                                                     | 1747 (60.9%)                               | 2210 (65.4%)                                | 40 (70.2%)                                             | 444 (75.9%)                                        | 68 (74.7%)                                              |
| Low                                                              | 146 (5.1%)                                 | 193 (5.7%)                                  | 4 (7.0%)                                               | 25 (4.3%)                                          | 5 (5.5%)                                                |
| Cardiovascular health <sup>b</sup>                               |                                            |                                             |                                                        |                                                    |                                                         |
| Number of metrics at intermediate/ideal level in 1997, mean (SD) | 4.9 (1.3)                                  | 4.8 (1.4)                                   | 4.5 (1.5)                                              | 5.0 (1.3)                                          | 4.7 (1.5)                                               |

Values are reported as No. (%) unless otherwise indicated.

<sup>a</sup> Depressive symptoms trajectories were calculated from 1997 up to 2015

<sup>b</sup> The cardiovascular health metrics included nonsmoking and intermediate or ideal levels of body weight, physical activity, diet, blood pressure, glucose and cholesterol.

**eTable 4.** Associations of Cardiovascular Health (in 1997) and 7-Year Change in Cardiovascular Health (Between 1990 and 1997) With Incident Depressive Symptoms—Results of Additional Analysis

|                                                                                                                                                                                                                                          | Adjusted odds ratio [95%CI] <sup>a,b</sup> |
|------------------------------------------------------------------------------------------------------------------------------------------------------------------------------------------------------------------------------------------|--------------------------------------------|
| <b>Main analysis</b>                                                                                                                                                                                                                     |                                            |
| Cardiovascular health per one additional intermediate/ideal metric                                                                                                                                                                       | 0.87 [0.84 - 0.91]                         |
| 7-year change in cardiovascular health per one higher intermediate/ideal metric                                                                                                                                                          | 0.91 [0.86 - 0.96]                         |
| <b>After excluding individuals with incident coronary heart disease (n=378 excluded)</b>                                                                                                                                                 |                                            |
| Cardiovascular health per one additional intermediate/ideal metric                                                                                                                                                                       | 0.88 [0.84 - 0.92]                         |
| 7-year change in cardiovascular health per one higher intermediate/ideal metric                                                                                                                                                          | 0.91 [0.86 - 0.97]                         |
| <b>Only individuals included with complete follow-up data (total included in analysis n=4832, with 1269 individuals with depressive symptoms at one or more follow-up examinations)</b>                                                  |                                            |
| Cardiovascular health per one additional intermediate/ideal metric                                                                                                                                                                       | 0.86 [0.82 - 0.91]                         |
| 7-year change in cardiovascular health per one higher intermediate/ideal metric                                                                                                                                                          | 0.88 [0.82 - 0.94]                         |
| <b>After multiple imputation (total number included in analysis 8,904)<sup>c</sup></b>                                                                                                                                                   |                                            |
| Cardiovascular health per one additional intermediate/ideal metric                                                                                                                                                                       | 0.90 [0.86 - 0.93]                         |
| 7-year change in cardiovascular health per one higher intermediate/ideal metric                                                                                                                                                          | 0.93 [0.89 - 0.98]                         |
| <b>Incident depressive symptoms defined as CES-D ≥17 (total included in analysis n=6622, with 1957 individuals with depressive symptoms at one or more follow-up examinations)</b>                                                       |                                            |
| Cardiovascular health per one additional intermediate/ideal metric                                                                                                                                                                       | 0.89 [0.86 - 0.93]                         |
| 7-year change in cardiovascular health per one higher intermediate/ideal metric                                                                                                                                                          | 0.87 [0.82 - 0.92]                         |
| <b>Incident depressive symptoms defined as CES-D ≥23 (total included in analysis n=7895, with 1243 individuals with depressive symptoms at one or more follow-up examinations)</b>                                                       |                                            |
| Cardiovascular health per one additional intermediate/ideal metric                                                                                                                                                                       | 0.84 [0.80 - 0.89]                         |
| 7-year change in cardiovascular health per one higher intermediate/ideal metric                                                                                                                                                          | 0.81 [0.76 - 0.86]                         |
| <b>Incident depressive symptoms defined as CES-D ≥17 in men and CES-D ≥ 23 in women and/or use of antidepressant medication<sup>d</sup> (total included in analysis n=7354, with 1728 individuals with incident depressive symptoms)</b> |                                            |
| Cardiovascular health per one additional intermediate/ideal metric                                                                                                                                                                       | 0.87 [0.82 - 0.92]                         |
| 7-year change in cardiovascular health per one higher intermediate/ideal metric                                                                                                                                                          | 0.92 [0.86 - 0.98]                         |
| <b>Excluding individuals with depressive symptoms within 3 years of follow-up (total included in analysis n=5808, with 976 individuals with depressive symptoms at one or more follow-up examinations)</b>                               |                                            |
| Cardiovascular health per one additional intermediate/ideal metric                                                                                                                                                                       | 0.87 [0.82 - 0.92]                         |
| 7-year change in cardiovascular health per one higher intermediate/ideal metric                                                                                                                                                          | 0.91 [0.84 - 0.98]                         |
| <b>Additional adjustment for childhood life events<sup>e</sup> (total included in analysis n=6622)</b>                                                                                                                                   |                                            |
| Cardiovascular health per one additional intermediate/ideal metric                                                                                                                                                                       | 0.90 [0.85 - 0.94]                         |
| 7-year change in cardiovascular health per one higher intermediate/ideal metric                                                                                                                                                          | 0.94 [0.88 - 1.00]                         |
| <b>Additional adjustment for psychosocial work environment<sup>f</sup> (total included in analysis n=6219)</b>                                                                                                                           |                                            |
| Cardiovascular health per one additional intermediate/ideal metric                                                                                                                                                                       | 0.88 [0.84 - 0.92]                         |
| 7-year change in cardiovascular health per one higher intermediate/ideal metric                                                                                                                                                          | 0.91 [0.86 - 0.97]                         |
| <b>Additional adjustment for psychosocial factors at work<sup>g</sup> (total included in analysis n=5125)</b>                                                                                                                            |                                            |
| Cardiovascular health per one additional intermediate/ideal metric                                                                                                                                                                       | 0.85 [0.81 - 0.90]                         |
| 7-year change in cardiovascular health per one higher intermediate/ideal metric                                                                                                                                                          | 0.88 [0.82 - 0.94]                         |

Abbreviations: CI=confidence interval, CES-D=Center for Epidemiologic Studies Depression Scale

<sup>a</sup> Odds ratios were adjusted for age, sex, education and occupation. <sup>b</sup> Analyses on 7-year change in cardiovascular health (between 1990 and 1997) were additionally adjusted for number of metrics at intermediate/ideal level in 1990

<sup>c</sup> Imputation of missing covariates (imputed in 887 individuals) and cardiovascular health metrics (imputed in 1037 individuals) with multiple imputation using fully conditional specification method under SAS MI procedure (n=10 imputations). Metrics were not imputed if participants had missing data on all individual cardiovascular health metrics (n=2658).

<sup>d</sup> Antidepressant medication use was available since 2007 via linkage with the French National claims data

<sup>e</sup> Presence of adverse childhood life events (before age 17) was evaluated in 2004 by the ACLE questionnaire (subscales: material deprivation, history of early separation and history of conflicts or violence).<sup>2</sup>

<sup>f</sup> Psychosocial work environment was evaluated in 1997 by the short version of the effort–reward imbalance questionnaire (subscales: effort, reward and over-commitment).<sup>3</sup>

<sup>g</sup> Psychosocial factors at work was evaluated in 1997 by the Karasek Job Content Questionnaire (scales: decision latitude, psychological demands, social support and physical demands).<sup>4</sup>

**eTable 5.** Associations of Individual Cardiovascular Health Metrics (Measured in 1997) With Incident Clinically Relevant Depressive Symptoms

| <b>Intermediate/ideal vs poor level of each cardiovascular health metric in 1997</b> | <b>Number of individuals with intermediate/ideal cardiovascular health of the individual metric</b> | <b>Adjusted odds ratio [95% confidence interval]<sup>a</sup></b> |
|--------------------------------------------------------------------------------------|-----------------------------------------------------------------------------------------------------|------------------------------------------------------------------|
| Smoking                                                                              | 5875                                                                                                | 0.73 [0.64 - 0.83]                                               |
| Body mass index                                                                      | 6398                                                                                                | 0.86 [0.72 - 1.03]                                               |
| Physical activity                                                                    | 2653                                                                                                | 0.83 [0.75 - 0.93]                                               |
| Healthy diet                                                                         | 1985                                                                                                | 1.03 [0.91 - 1.15]                                               |
| High blood pressure                                                                  | 5649                                                                                                | 0.82 [0.72 - 0.93]                                               |
| Hyperglycemia                                                                        | 6681                                                                                                | 0.68 [0.54 - 0.86]                                               |
| Dyslipidemia                                                                         | 4807                                                                                                | 0.86 [0.77 - 0.97]                                               |

<sup>a</sup> Odds ratios were adjusted for age, sex, education and occupation. For each metric, the poor level is used as the reference category.

**eTable 6.** Associations of 7-Year Change in Each Cardiovascular Health Metric (Between 1990 and 1997) With Incident Clinically Relevant Depressive Symptoms

| Change in cardiovascular health between 1990 and 1997 | n              | Adjusted odds ratio [95% confidence interval] <sup>a</sup> |
|-------------------------------------------------------|----------------|------------------------------------------------------------|
| <b>Smoking</b>                                        |                |                                                            |
| Consistently poor                                     | 939            | 1 [reference]                                              |
| Poor to intermediate/ideal                            | 565            | 0.79 [0.63 - 0.99]                                         |
| Intermediate/ideal to poor                            | 166            | 1.33 [0.98 - 1.80]                                         |
| Consistently intermediate/ideal                       | 5310           | 0.76 [0.66 - 0.88]                                         |
| <b>Body mass index</b>                                |                |                                                            |
| Consistently poor                                     | 258            | 1 [reference]                                              |
| Poor to intermediate/ideal                            | 39             | 1.55 [0.86 - 2.79]                                         |
| Intermediate/ideal to poor                            | 324            | 0.69 [0.49 - 0.97]                                         |
| Consistently intermediate/ideal                       | 6359           | 0.70 [0.55 - 0.90]                                         |
| <b>Physical activity</b>                              |                |                                                            |
| Consistently poor                                     | 3651           | 1 [reference]                                              |
| Poor to intermediate/ideal                            | 673            | 0.97 [0.81 - 1.16]                                         |
| Intermediate/ideal to poor                            | 676            | 0.84 [0.70 - 1.02]                                         |
| Consistently intermediate/ideal                       | 1980           | 0.76 [0.67 - 0.86]                                         |
| <b>Healthy diet</b>                                   |                |                                                            |
| Consistently poor                                     | 4144           | 1 [reference]                                              |
| Poor to intermediate/ideal                            | 1139           | 0.99 [0.85 - 1.14]                                         |
| Intermediate/ideal to poor                            | 851            | 0.94 [0.79 - 1.11]                                         |
| Consistently intermediate/ideal                       | 846            | 0.89 [0.82 - 1.24]                                         |
| <b>High blood pressure</b>                            |                |                                                            |
| Consistently poor                                     | 637            | 1 [reference]                                              |
| Poor to intermediate/ideal                            | 0 <sup>b</sup> | -                                                          |
| Intermediate/ideal to poor                            | 694            | 0.97 [0.78 - 1.22]                                         |
| Consistently intermediate/ideal                       | 5649           | 0.80 [0.68 - 0.96]                                         |
| <b>Hyperglycemia</b>                                  |                |                                                            |
| Consistently poor                                     | 122            | 1 [reference]                                              |
| Poor to intermediate/ideal                            | 0 <sup>b</sup> | -                                                          |
| Intermediate/ideal to poor                            | 177            | 1.28 [0.81 - 2.02]                                         |
| Consistently intermediate/ideal                       | 6681           | 0.79 [0.55 - 1.15]                                         |
| <b>Dyslipidemia</b>                                   |                |                                                            |
| Consistently poor                                     | 903            | 1 [reference]                                              |
| Poor to intermediate/ideal                            | 0 <sup>b</sup> | -                                                          |
| Intermediate/ideal to poor                            | 1270           | 0.93 [0.77 - 1.11]                                         |
| Consistently intermediate/ideal                       | 4807           | 0.83 [0.71 - 0.97]                                         |

<sup>a</sup> Odds ratios were adjusted for age, sex, education and occupation. The consistently poor category is used as the reference category

<sup>b</sup> For the metrics high blood pressure, hyperglycemia and dyslipidemia, no individuals changed from a poor level (i.e. diagnosis of hypertension, diabetes or dyslipidemia or use of antihypertensive, glucose-lowering or lipid-modifying medication, respectively) to an intermediate/ideal level. For definition of individual metrics, see eTable 1.



## eReferences.

1. Jones BL, Nagin DS. Advances in Group-Based Trajectory Modeling and an SAS Procedure for Estimating Them. *Sociol Methods Res.* 2007;35(4):542-571.
2. Airagnes G, Lemogne C, Hoertel N, Goldberg M, Limosin F, Zins M. Childhood adversity and depressive symptoms following retirement in the Gazel cohort. *J Psychiatr Res.* 2016;82:80-90.
3. Siegrist J, Starke D, Chandola T, et al. The measurement of effort-reward imbalance at work: European comparisons. *Soc Sci Med.* 2004;58(8):1483-1499.
4. Niedhammer I. Psychometric properties of the French version of the Karasek Job Content Questionnaire: a study of the scales of decision latitude, psychological demands, social support, and physical demands in the GAZEL cohort. *Int Arch Occup Environ Health.* 2002;75(3):129-144.
