# Supplementary material
Source: PubMed Central journal article supplement (PMC9932942)
Supplement: jamapsychiatry-e225056-s002.pdf [file jamapsychiatry-e225056-s002.pdf]

## Data Sharing Statement

van Sloten. Association of Cardiovascular Health With Risk of Clinically Relevant Depressive Symptoms. *JAMA Psychiatry*. Published February 15, 2023.  
doi:10.1001/jamapsychiatry.2022.5056

### Data

**Data available:** Yes

**Data types:** Data dictionary

**How to access data:** Access of data via request for data to the principal investigators of GAZEL Cohort Study ([marcel.goldberg@inserm.fr](mailto:marcel.goldberg@inserm.fr))

**When available:** With publication

### Supporting Documents

**Document types:** Statistical/analytic code

**How to access documents:** Access of scripts via request to study investigators ([jean-philippe.empana@inserm.fr](mailto:jean-philippe.empana@inserm.fr))

**When available:** With publication

### Additional Information

**Who can access the data:** Researchers whose proposed use of the data has been approved

**Types of analyses:** Specified purpose

**Mechanisms of data availability:** After approval of a proposal and with a signed data access agreement
